# Supplementary material
Source: PubMed Central journal article supplement (PMC2565276)
Supplement: NIHMS61668-supplement-si20061007_042.pdf [file NIHMS61668-supplement-si20061007_042.pdf]

## Staudinger Ligation of Peptides at Non-Glycyl Residues

Matthew B. Soellner,<sup>†,‡</sup> Annie Tam,<sup>†</sup> and Ronald T. Raines<sup>\*,†,§</sup>

*Departments of Chemistry and Biochemistry,  
University of Wisconsin–Madison, Madison, WI 53706*

| <b>Page</b> | <b>Contents</b>                                    |
|-------------|----------------------------------------------------|
| S1          | Table of Contents                                  |
| S2          | General Experimental Procedures                    |
| S3          | <sup>1</sup> H NMR Spectrum of Compound <b>10</b>  |
| S4          | <sup>13</sup> C NMR Spectrum of Compound <b>10</b> |
| S5          | <sup>31</sup> P NMR Spectrum of Compound <b>10</b> |
| S6          | <sup>1</sup> H NMR Spectrum of Compound <b>14</b>  |
| S7          | <sup>13</sup> C NMR Spectrum of Compound <b>14</b> |
| S8          | <sup>31</sup> P NMR Spectrum of Compound <b>14</b> |
| S9          | <sup>1</sup> H NMR Spectrum of Compound <b>15</b>  |
| S10         | <sup>13</sup> C NMR Spectrum of Compound <b>15</b> |
| S11         | <sup>31</sup> P NMR Spectrum of Compound <b>15</b> |
| S12         | <sup>1</sup> H NMR Spectrum of Compound <b>18</b>  |
| S13         | <sup>13</sup> C NMR Spectrum of Compound <b>18</b> |
| S14         | <sup>31</sup> P NMR Spectrum of Compound <b>18</b> |
| S15         | <sup>1</sup> H NMR Spectrum of Compound <b>21</b>  |
| S16         | <sup>13</sup> C NMR Spectrum of Compound <b>21</b> |
| S17         | <sup>31</sup> P NMR Spectrum of Compound <b>21</b> |
| S18         | <sup>1</sup> H NMR Spectrum of Compound <b>24</b>  |
| S19         | <sup>13</sup> C NMR Spectrum of Compound <b>24</b> |
| S20         | <sup>31</sup> P NMR Spectrum of Compound <b>24</b> |
| S21         | <sup>1</sup> H NMR Spectrum of Compound <b>25</b>  |
| S22         | <sup>13</sup> C NMR Spectrum of Compound <b>25</b> |
| S23         | <sup>31</sup> P NMR Spectrum of Compound <b>25</b> |
| S24         | <sup>1</sup> H NMR Spectrum of Compound <b>26</b>  |
| S25         | <sup>13</sup> C NMR Spectrum of Compound <b>26</b> |
| S26–28      | Data from Theoretical Calculations for Table 1     |
| S29–30      | Data from Theoretical Calculations for Table 2     |

## General Experimental Procedures

**General Materials.** Reagent chemicals were obtained from commercial suppliers, and reagent-grade solvents were used without further purification. Reactions were performed at room temperature, and were monitored by thin-layer chromatography with visualization by UV light or staining with ninhydrin or I<sub>2</sub>. Compounds were purified with an Argonaut Flashmaster Solo automated chromatography system unless indicated otherwise. Silica gel used in flash chromatography had 230–400 mesh and 60-Å pore size.

**General Methods.** The removal of solvent “under reduced pressure” refers to the use of a rotary evaporator at water aspirator pressure (<20 torr) while maintaining the water-bath temperature below 40 °C. Residual DMF was removed from samples at high vacuum (<0.1 torr) by the use of a mechanical belt-drive oil pump.

**NMR Spectroscopy and Mass Spectrometry.** NMR spectra were obtained with a 500 or 400 MHz spectrometer at the National Magnetic Resonance Facility at Madison or the University of Wisconsin Nuclear Magnetic Resonance Facility, respectively. Carbon-13 and phosphorus-31 spectra were both proton-decoupled, and phosphorus-31 spectra were referenced against an external standard of deuterated phosphoric acid (0 ppm). Mass spectra were obtained with electrospray ionization (ESI) techniques.

**General Procedures for Staudinger Ligations.** Unless noted otherwise, Staudinger ligations were performed at room temperature with equimolar amounts of phosphinothioester (or phosphinoester) and azide (0.105 mmol) in a solvent (600 µL). Solvents were not degassed, and ligations were performed under air.

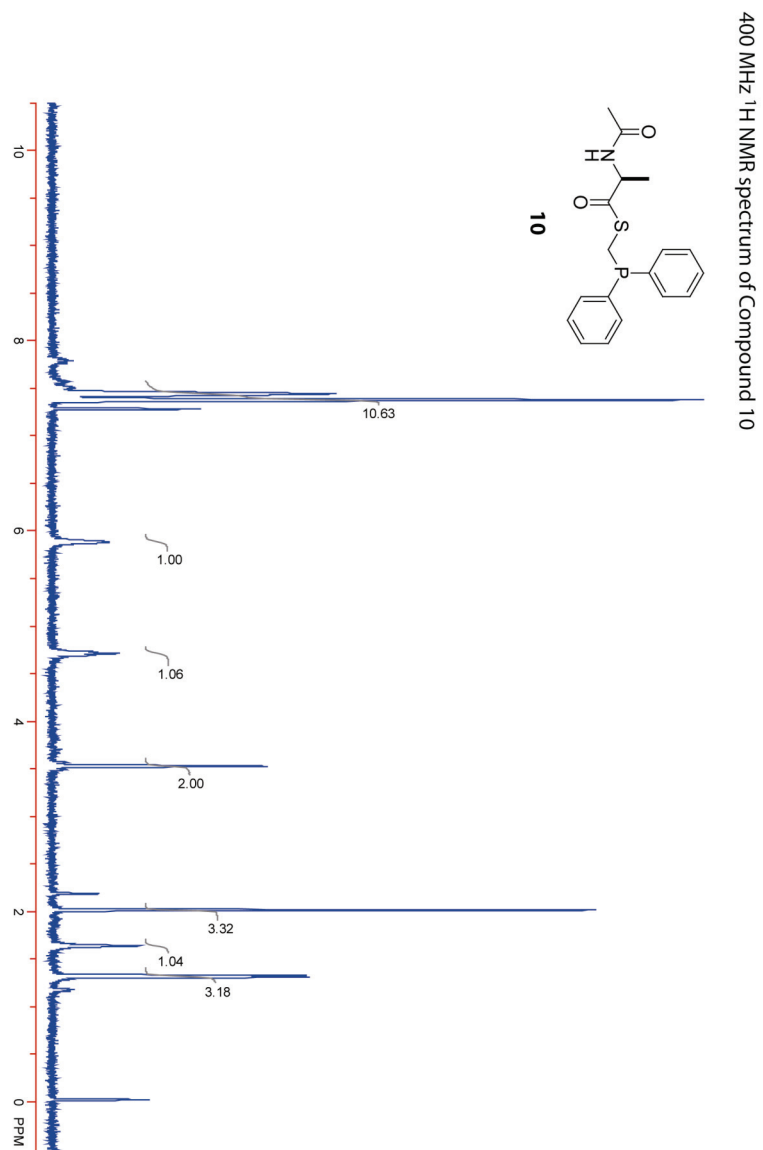

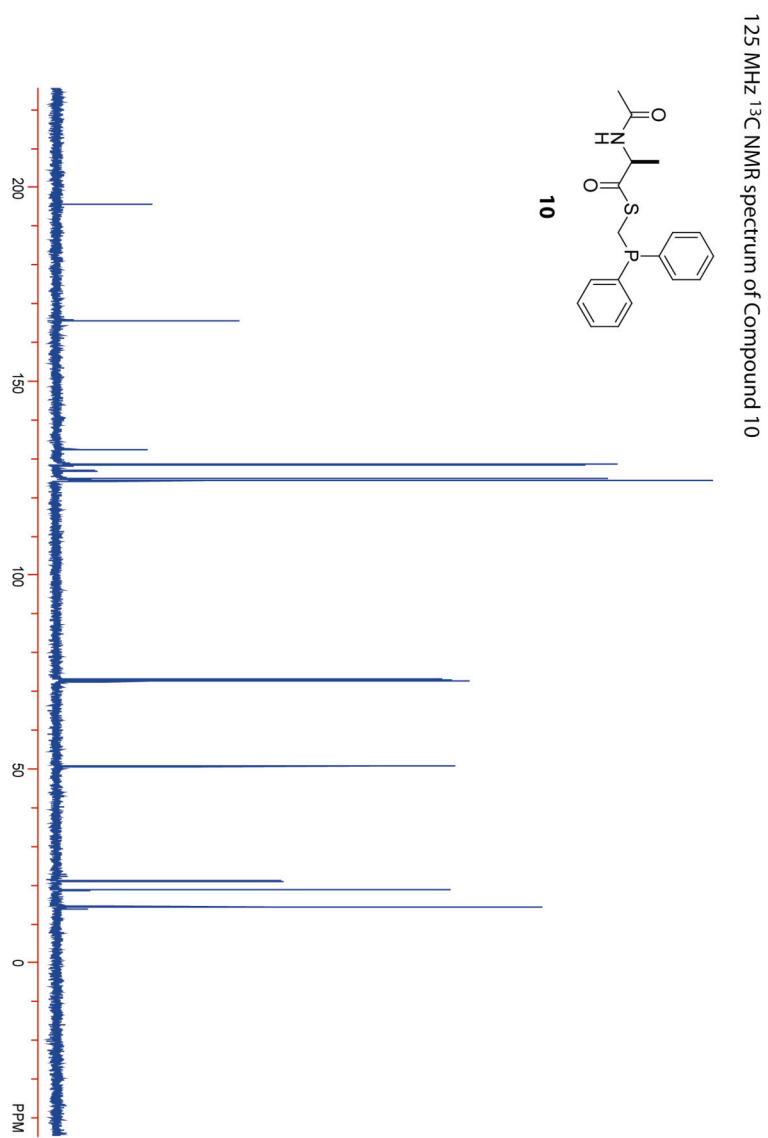

161 MHz  $^{31}\text{P}$  NMR spectrum of Compound 10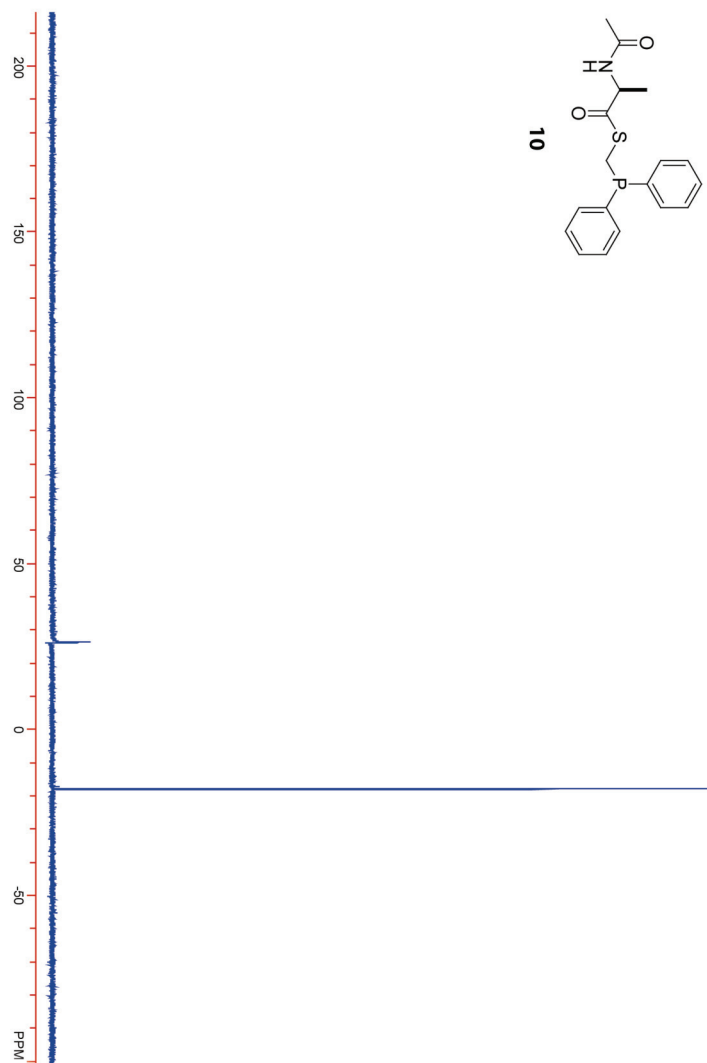

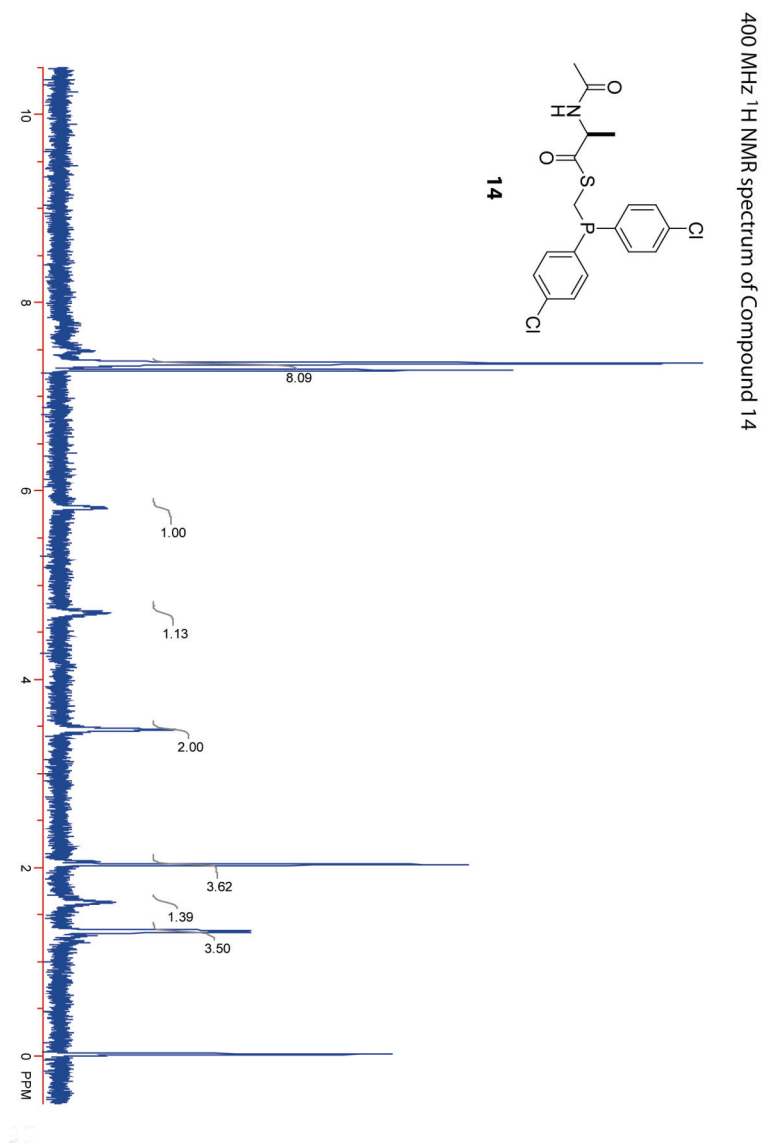

125 MHz  $^{13}\text{C}$  NMR spectrum of Compound 14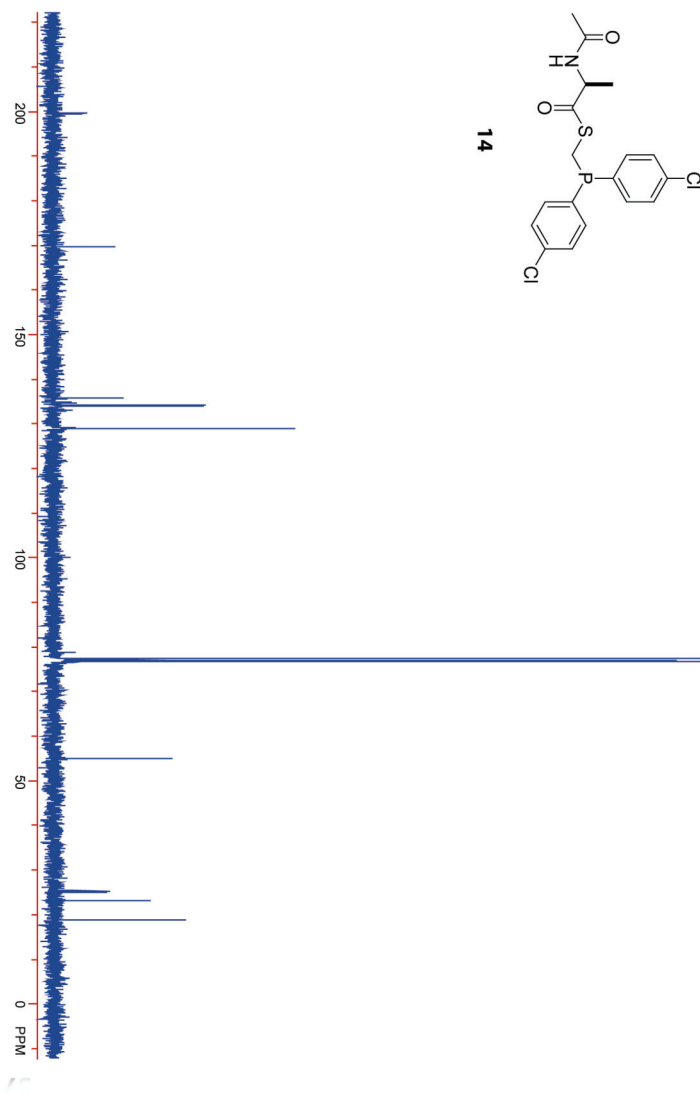

161 MHz  $^3\text{P}$  NMR spectrum of Compound 14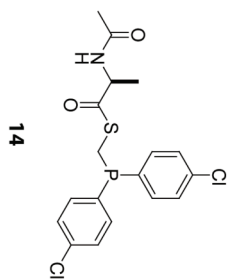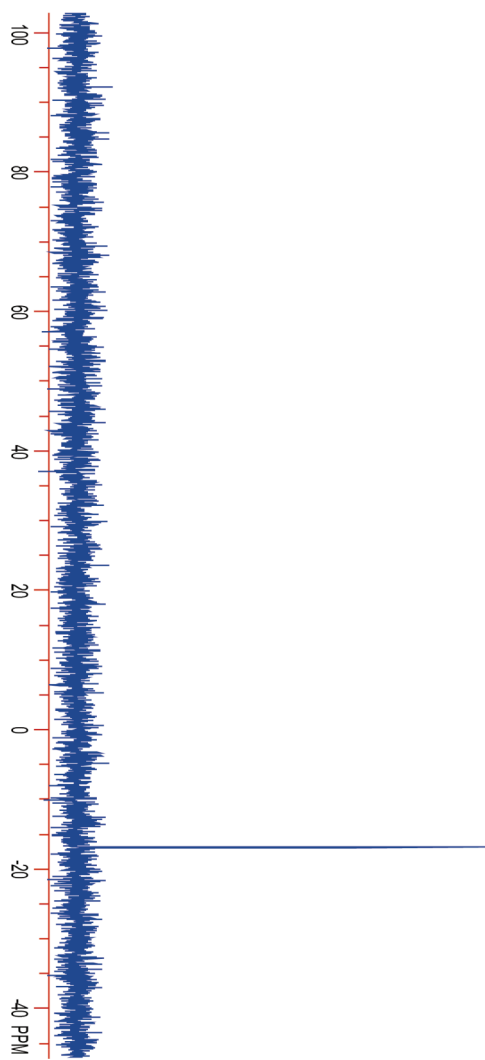



400 MHz  $^1\text{H}$  NMR spectrum of Compound 15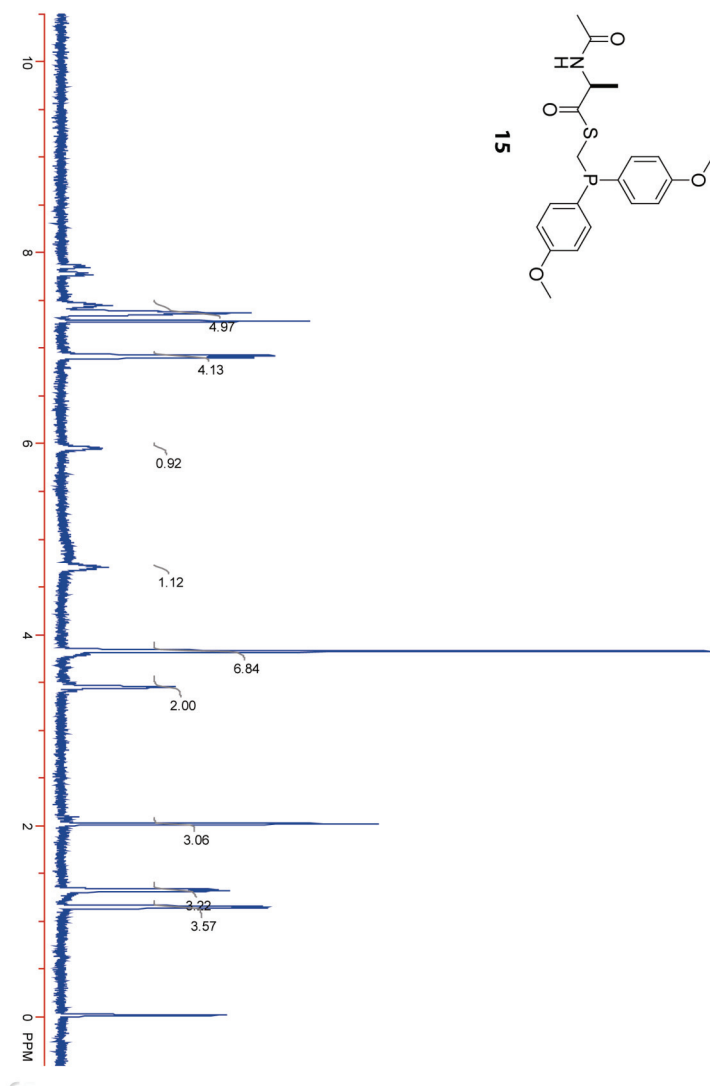

125 MHz  $^{13}\text{C}$  NMR spectrum of Compound 15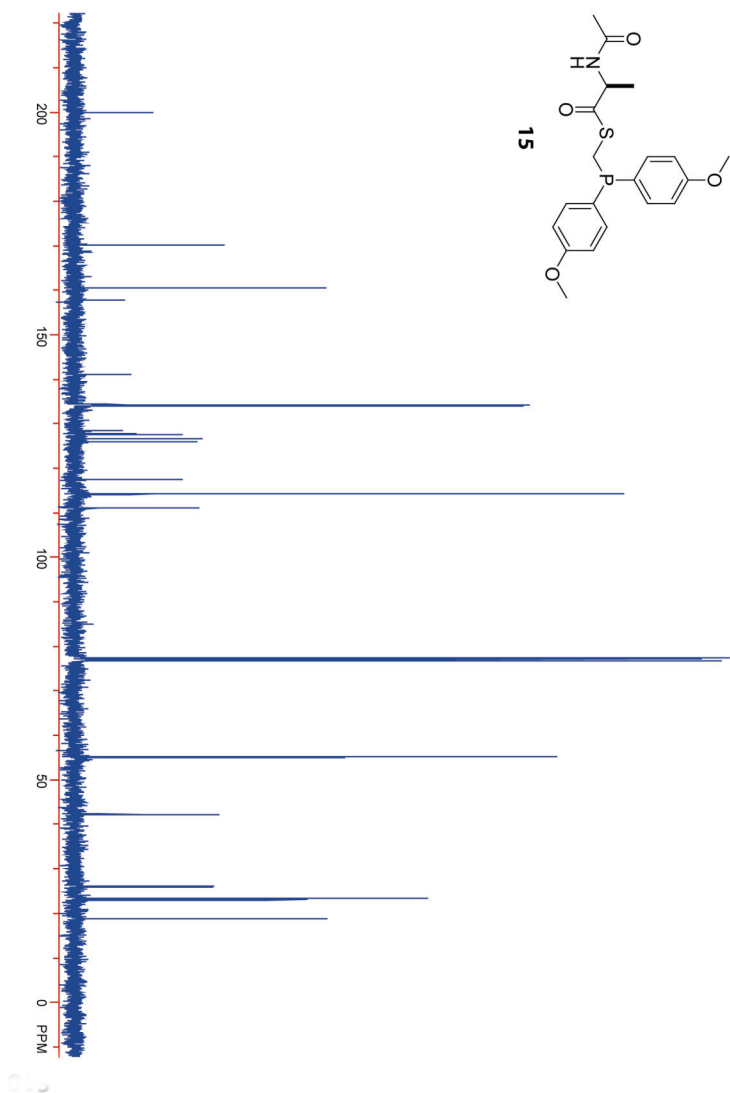

$^{161}\text{MHz } ^{31}\text{P}$  NMR spectrum of Compound 15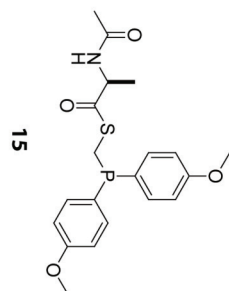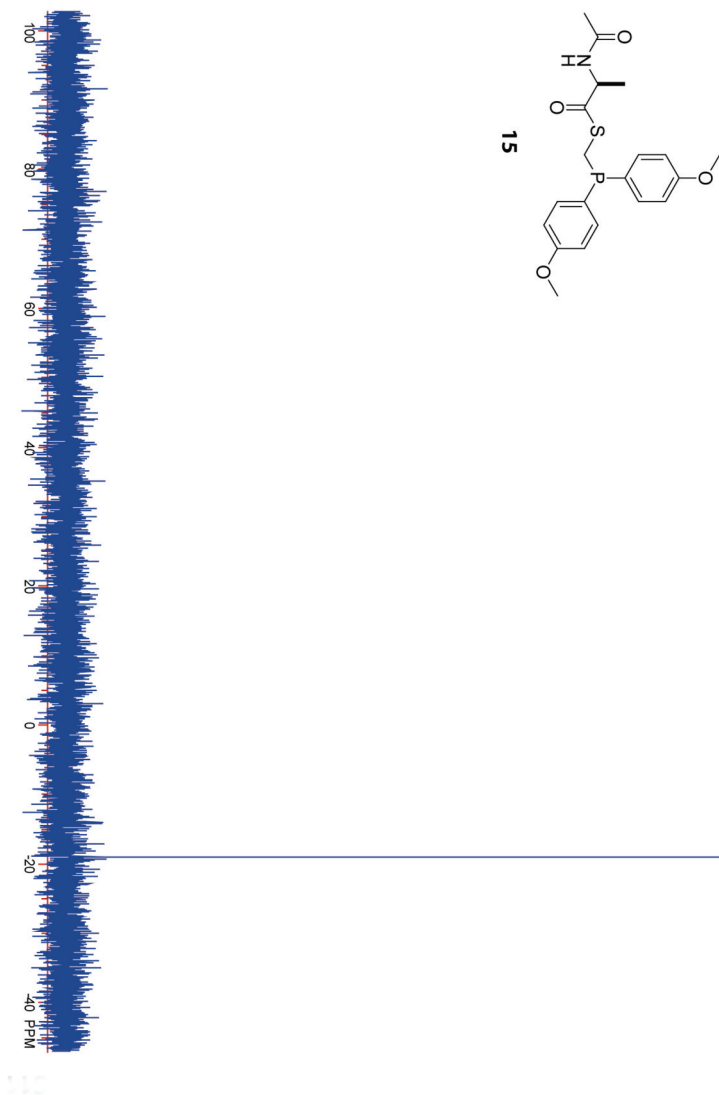

400 MHz  $^1\text{H}$  NMR spectrum of Compound 18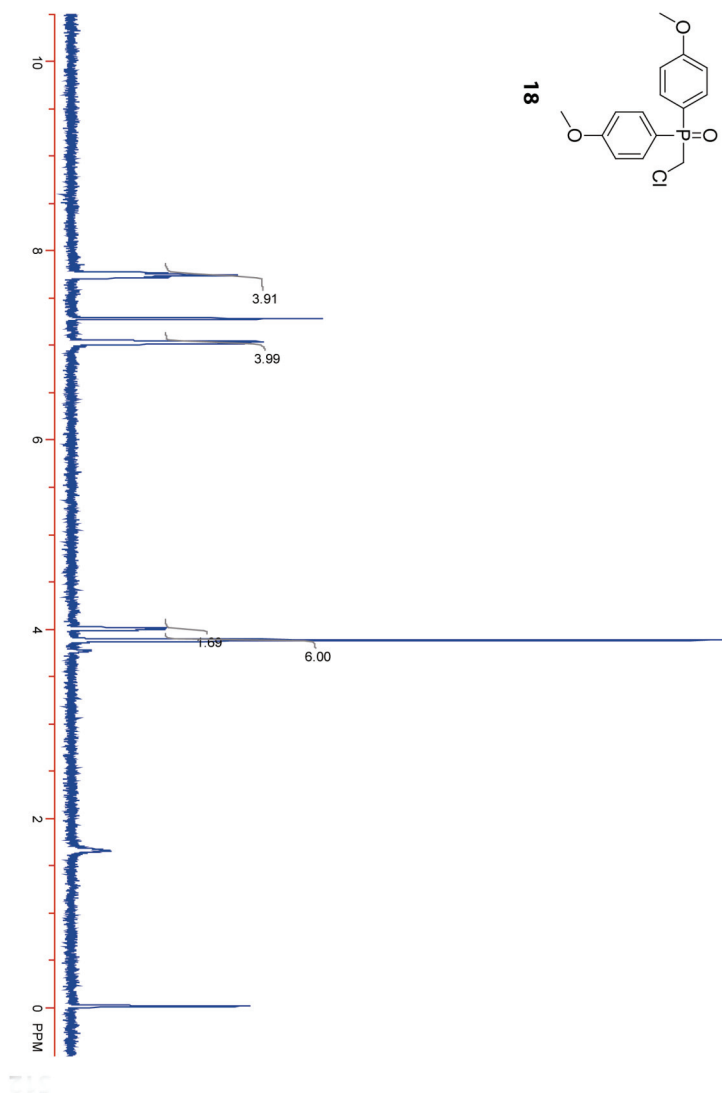

125 MHz  $^{13}\text{C}$  NMR spectrum of Compound 18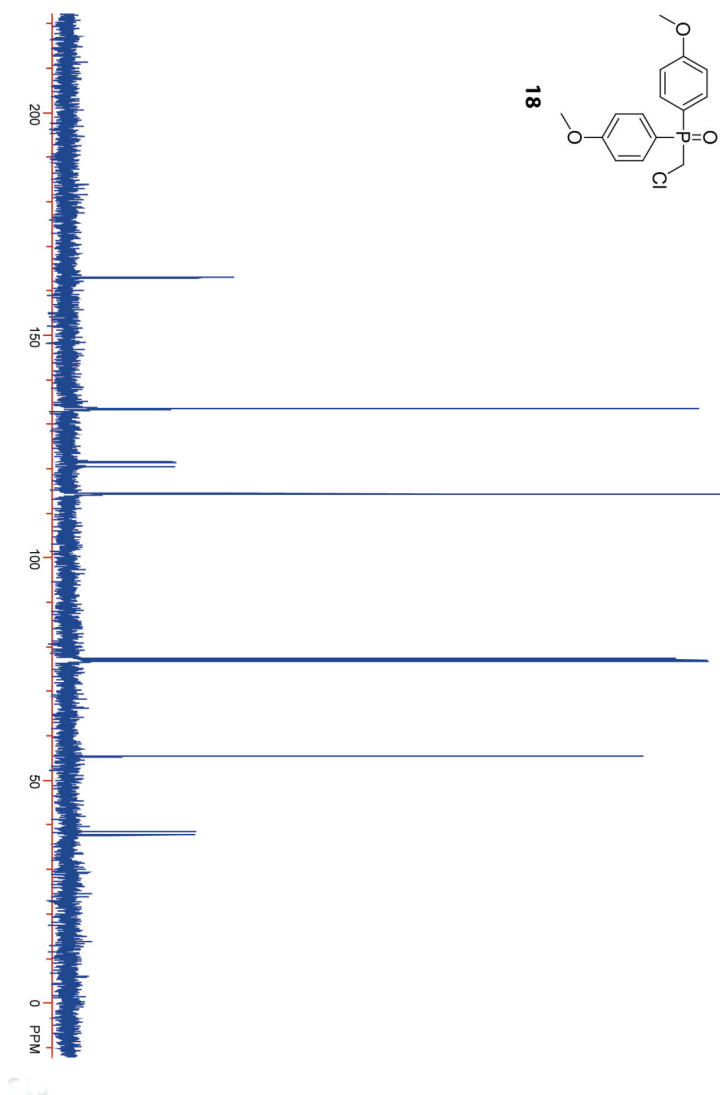

161 MHz  $^{31}\text{P}$  NMR spectrum of Compound 18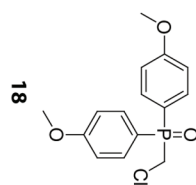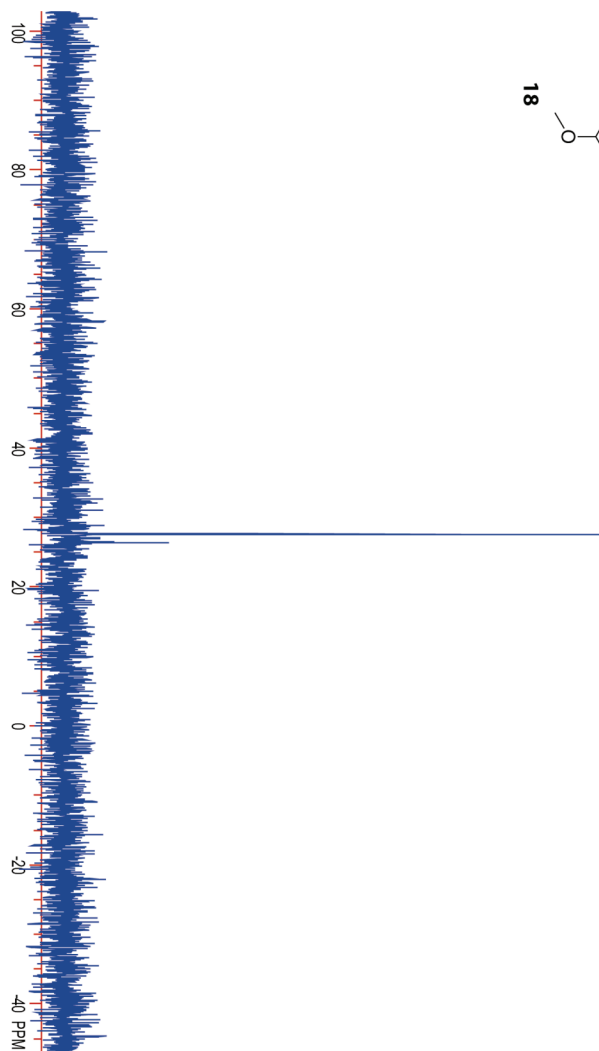

400 MHz  $^1\text{H}$  NMR spectrum of Compound 21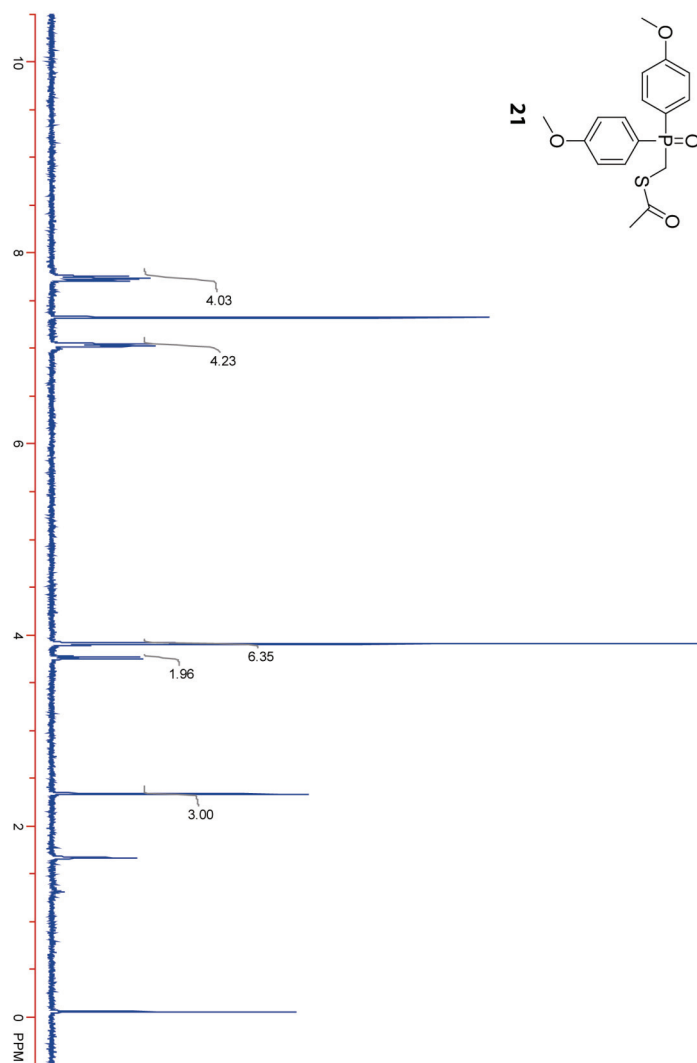

125 MHz  $^{13}\text{C}$  NMR spectrum of Compound 21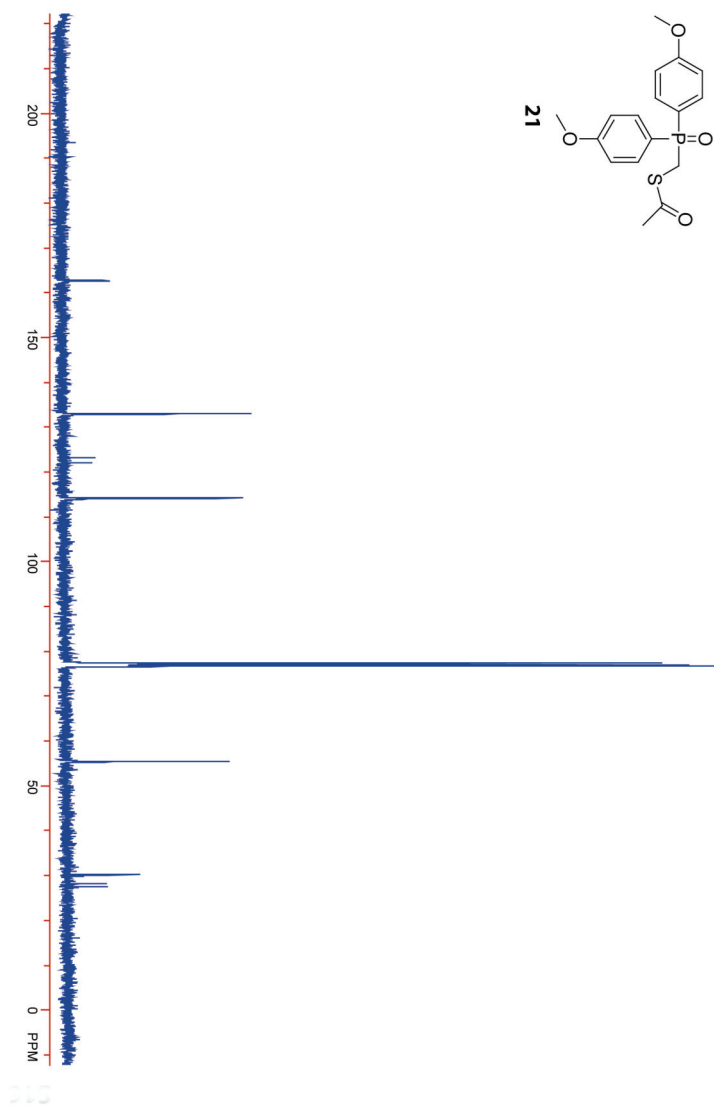



161 MHz  $^{31}\text{P}$  NMR spectrum of Compound 21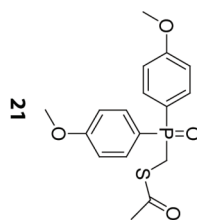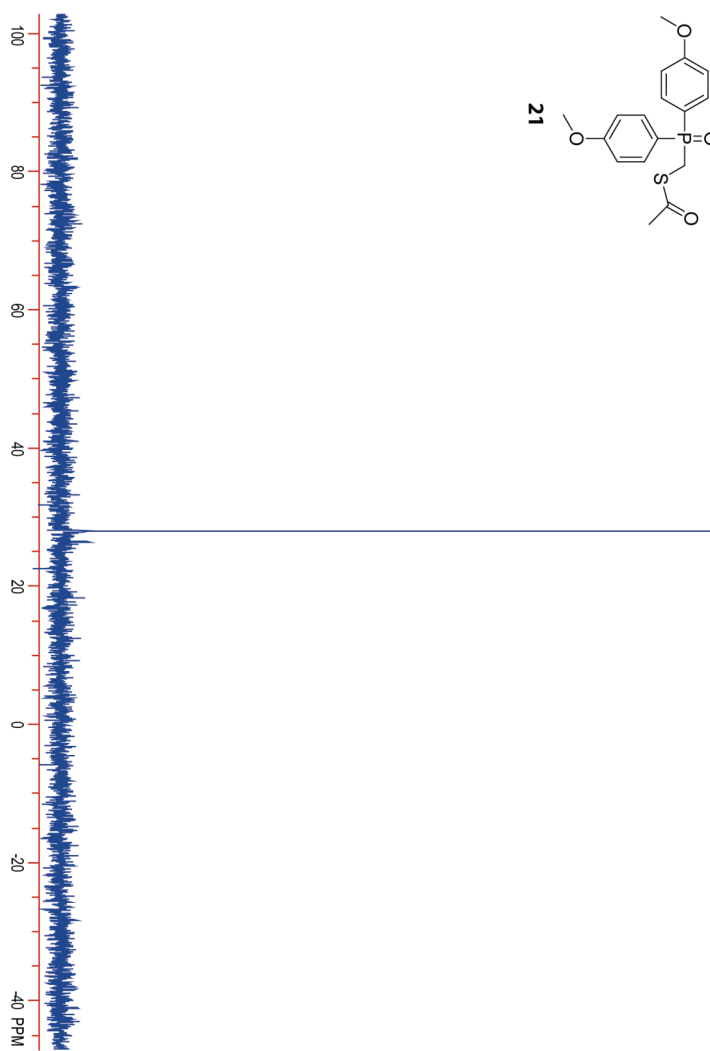

400 MHz  $^1\text{H}$  NMR spectrum of Compound 24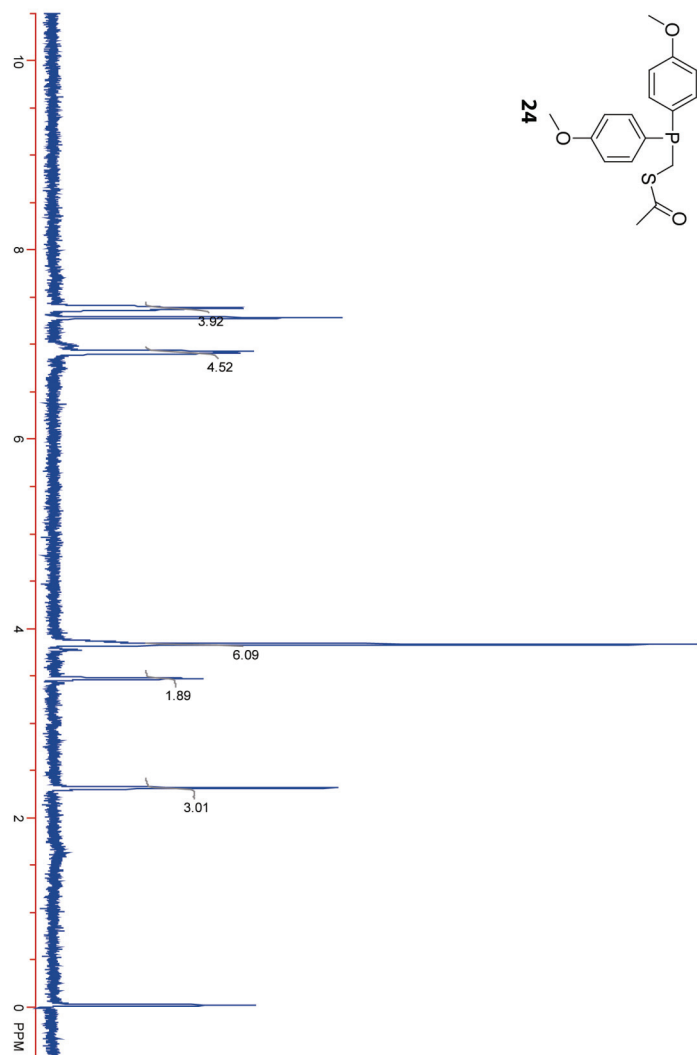

125 MHz  $^{13}\text{C}$  NMR spectrum of Compound 24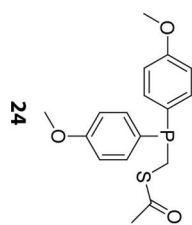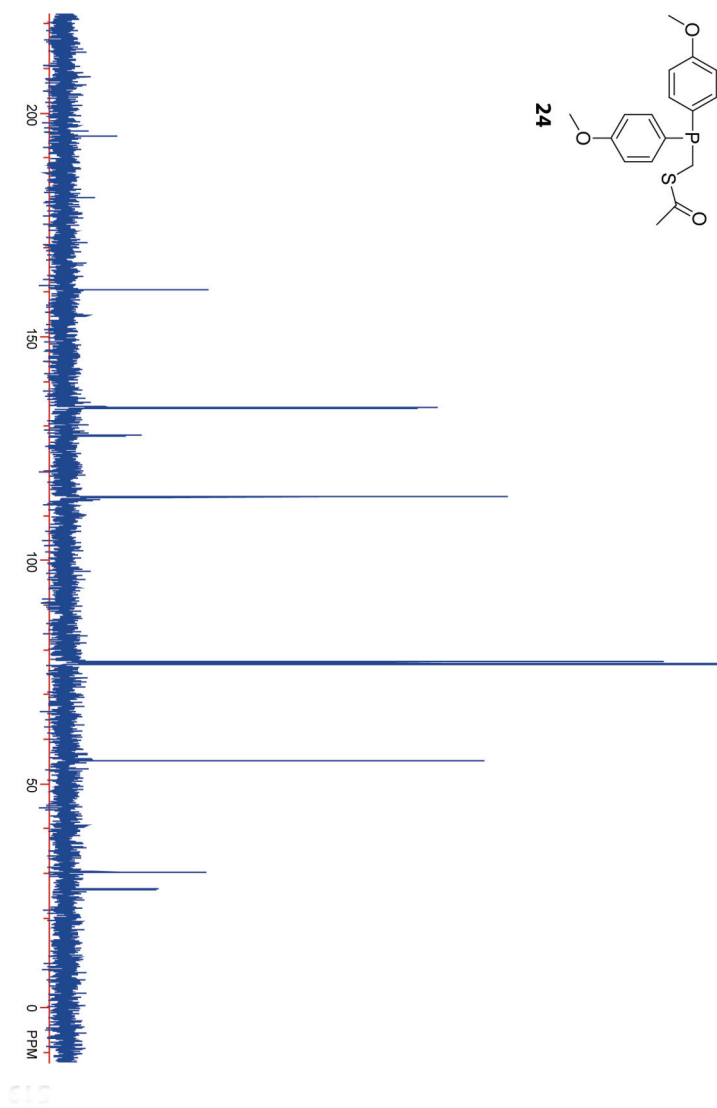

161 MHz  $^{31}\text{P}$  NMR spectrum of Compound 24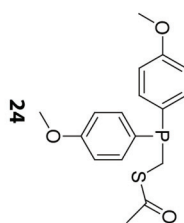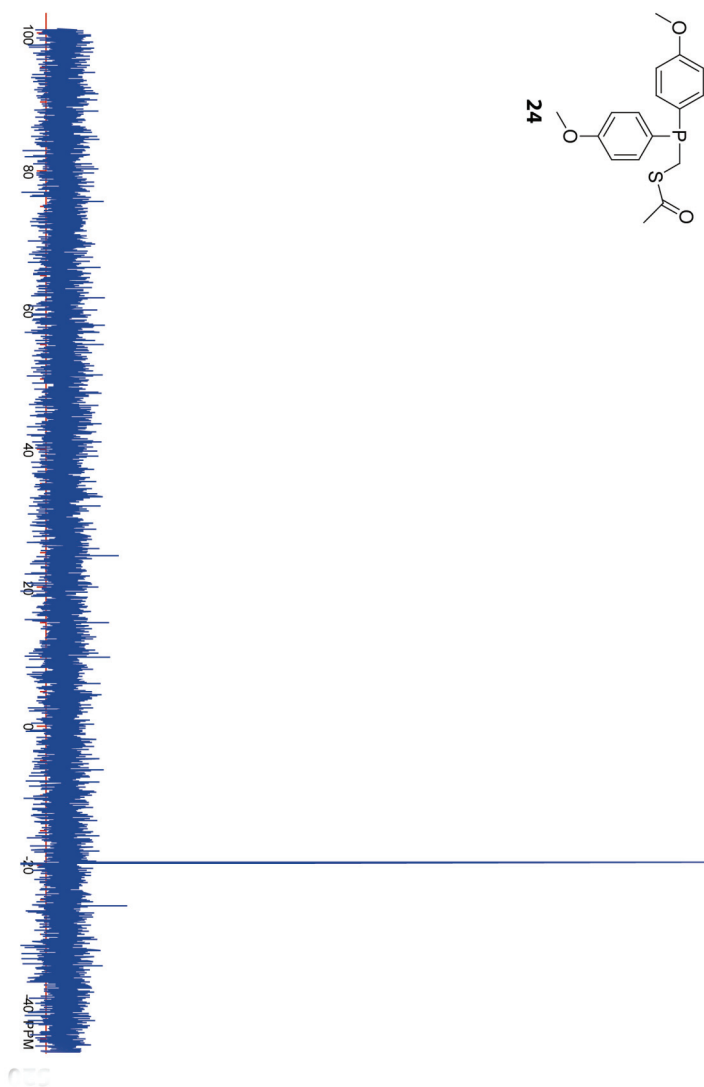

400 MHz  $^1\text{H}$  NMR spectrum of Compound 25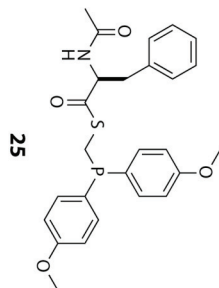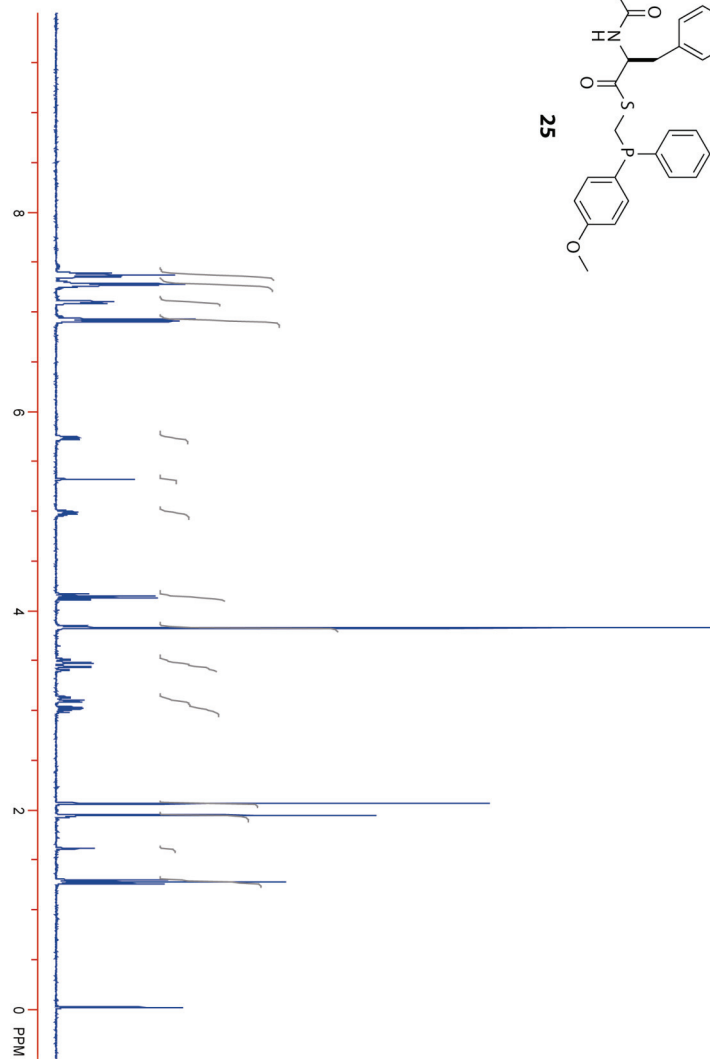

125 MHz  $^{13}\text{C}$  NMR spectrum of Compound 25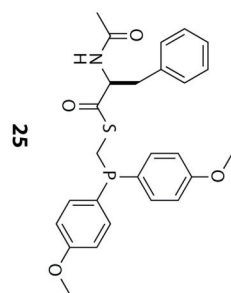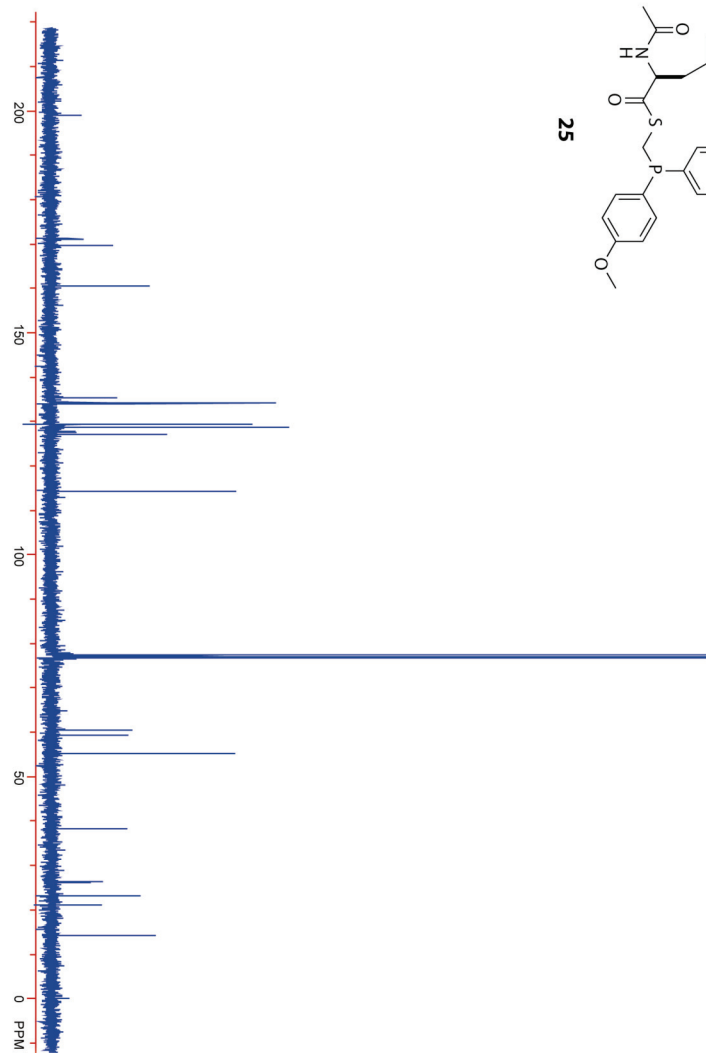

161 MHz  $^{31}\text{P}$  NMR spectrum of Compound 25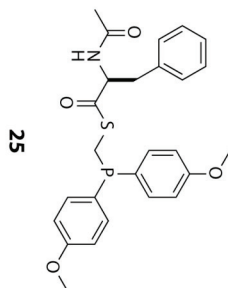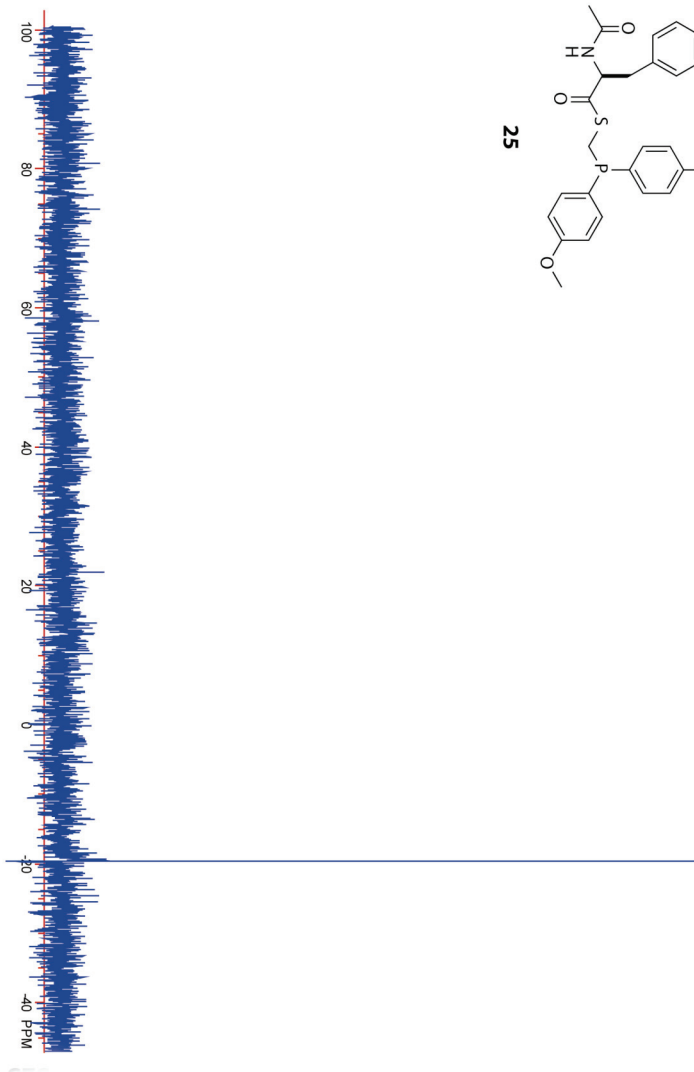

400 MHz  $^1\text{H}$  NMR spectrum of Compound 26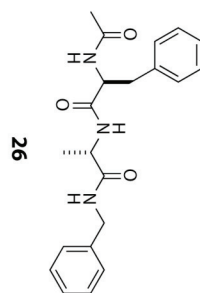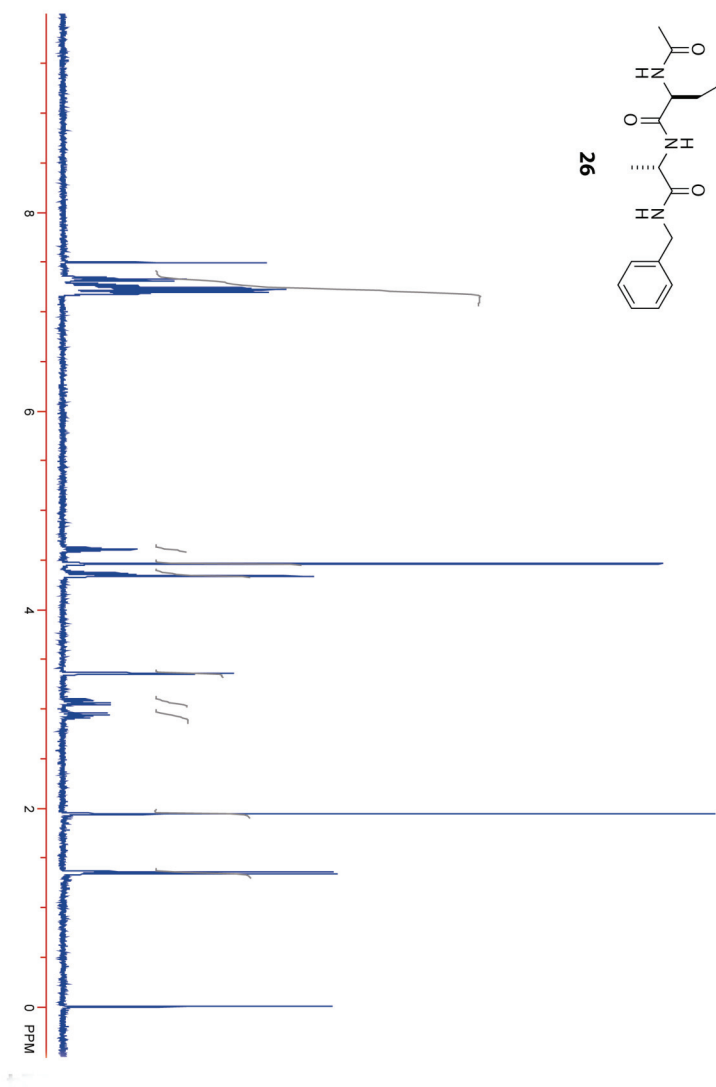



125 MHz  $^{13}\text{C}$  NMR spectrum of Compound 26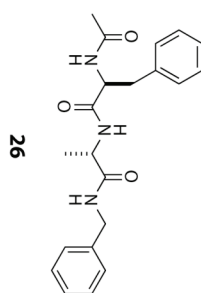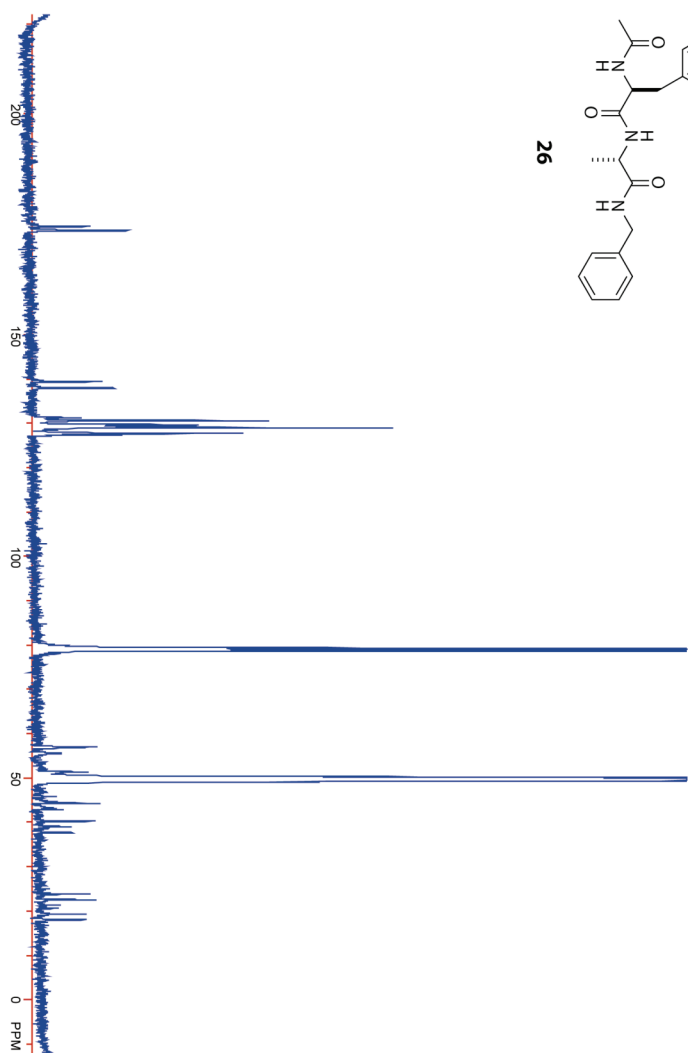

**Table 1, Cl entry**

Energy (Hartrees) and optimized geometry (B3LYP/6-31+G(d,p)):

 $E = -695.1208559674$   $ZPVE = 0.235964$ 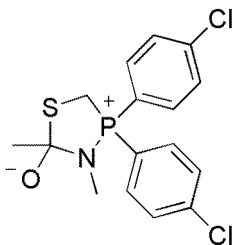

| Center Number | Atomic Number | Atomic Type | Coordinates (Angstroms) |           |           |
|---------------|---------------|-------------|-------------------------|-----------|-----------|
|               |               |             | X                       | Y         | Z         |
| 1             | 6             | 0           | 0.087465                | 1.897620  | 0.236664  |
| 2             | 1             | 0           | 0.763455                | 1.627702  | 1.059299  |
| 3             | 1             | 0           | -0.908136               | 2.053239  | 0.674989  |
| 4             | 15            | 0           | -0.014978               | 0.481974  | -1.037368 |
| 5             | 16            | 0           | 0.652079                | 3.279920  | -0.745653 |
| 6             | 6             | 0           | 0.930322                | 4.658624  | 0.425765  |
| 7             | 6             | 0           | 0.686879                | 4.398047  | 1.891132  |
| 8             | 1             | 0           | -0.330365               | 4.019619  | 2.061876  |
| 9             | 1             | 0           | 1.393182                | 3.648920  | 2.275219  |
| 10            | 1             | 0           | 0.807687                | 5.304554  | 2.500347  |
| 11            | 8             | 0           | 1.301472                | 5.742801  | 0.033235  |
| 12            | 6             | 0           | -1.585797               | -0.321909 | -0.468370 |
| 13            | 6             | 0           | -2.747954               | 0.361930  | -0.812976 |
| 14            | 6             | 0           | -1.669177               | -1.551367 | 0.172937  |
| 15            | 6             | 0           | -3.995169               | -0.175209 | -0.514242 |
| 16            | 1             | 0           | -2.676151               | 1.329083  | -1.326692 |
| 17            | 6             | 0           | -2.910070               | -2.103373 | 0.475414  |
| 18            | 1             | 0           | -0.750994               | -2.089760 | 0.444276  |
| 19            | 6             | 0           | -4.066875               | -1.408851 | 0.130129  |
| 20            | 1             | 0           | -4.914044               | 0.357424  | -0.782563 |
| 21            | 1             | 0           | -2.982797               | -3.073546 | 0.978812  |
| 22            | 6             | 0           | 1.318758                | -0.659998 | -0.443357 |
| 23            | 6             | 0           | 2.111169                | -1.153375 | -1.474149 |
| 24            | 6             | 0           | 1.587007                | -1.017915 | 0.872933  |
| 25            | 6             | 0           | 3.173376                | -2.008302 | -1.197002 |
| 26            | 1             | 0           | 1.893962                | -0.858976 | -2.509022 |
| 27            | 6             | 0           | 2.646496                | -1.870694 | 1.165360  |
| 28            | 1             | 0           | 0.965953                | -0.631536 | 1.690477  |
| 29            | 6             | 0           | 3.433422                | -2.361350 | 0.125301  |
| 30            | 1             | 0           | 3.802686                | -2.400379 | -2.003481 |
| 31            | 1             | 0           | 2.865786                | -2.157453 | 2.199600  |
| 32            | 17            | 0           | 4.716987                | -3.394384 | 0.473080  |
| 33            | 17            | 0           | -5.572851               | -2.069316 | 0.494492  |

**Table 1, H entry**

Energy (Hartrees) and optimized geometry (B3LYP/6-31+G(d,p)):

 $E = -586.9660504650$   $ZPVE = 0.254291$ 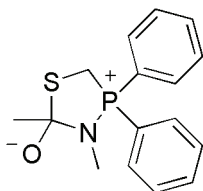

| Center Number | Atomic Number | Atomic Type | Coordinates (Angstroms) |           |           |
|---------------|---------------|-------------|-------------------------|-----------|-----------|
|               |               |             | X                       | Y         | Z         |
| 1             | 6             | 0           | 0.000000                | 0.000000  | 0.000000  |
| 2             | 1             | 0           | 0.000000                | 0.000000  | 1.099057  |
| 3             | 1             | 0           | 1.050846                | 0.000000  | -0.320794 |
| 4             | 15            | 0           | -0.875090               | 1.580726  | -0.611304 |
| 5             | 16            | 0           | -0.979824               | -1.317847 | -0.704786 |
| 6             | 6             | 0           | -0.098723               | -2.871334 | -0.309881 |
| 7             | 6             | 0           | 1.196692                | -2.773406 | 0.456627  |
| 8             | 1             | 0           | 1.960185                | -2.250699 | -0.136195 |
| 9             | 1             | 0           | 1.060240                | -2.217465 | 1.394381  |
| 10            | 1             | 0           | 1.602632                | -3.761190 | 0.715284  |
| 11            | 8             | 0           | -0.542198               | -3.944355 | -0.656656 |
| 12            | 6             | 0           | 0.353147                | 2.200615  | -1.852595 |
| 13            | 6             | 0           | -0.174811               | 2.380910  | -3.125341 |
| 14            | 6             | 0           | 1.692526                | 2.478115  | -1.611298 |
| 15            | 6             | 0           | 0.636360                | 2.840509  | -4.159290 |
| 16            | 1             | 0           | -1.232701               | 2.154471  | -3.308017 |
| 17            | 6             | 0           | 2.506528                | 2.938282  | -2.641952 |
| 18            | 1             | 0           | 2.109152                | 2.342342  | -0.605327 |
| 19            | 6             | 0           | 1.977607                | 3.119168  | -3.916440 |
| 20            | 1             | 0           | 0.219469                | 2.980931  | -5.161937 |
| 21            | 1             | 0           | 3.561480                | 3.159219  | -2.450038 |
| 22            | 1             | 0           | 2.617599                | 3.480992  | -4.727905 |
| 23            | 6             | 0           | -0.604607               | 2.724457  | 0.823624  |
| 24            | 6             | 0           | -1.636570               | 3.638396  | 1.001596  |
| 25            | 6             | 0           | 0.476694                | 2.724019  | 1.695813  |
| 26            | 6             | 0           | -1.588378               | 4.554240  | 2.048705  |
| 27            | 1             | 0           | -2.489438               | 3.629416  | 0.311472  |
| 28            | 6             | 0           | 0.527908                | 3.636429  | 2.745613  |
| 29            | 1             | 0           | 1.295076                | 2.005699  | 1.561890  |
| 30            | 6             | 0           | -0.504700               | 4.552405  | 2.921307  |
| 31            | 1             | 0           | -2.402241               | 5.273694  | 2.185997  |
| 32            | 1             | 0           | 1.380740                | 3.634250  | 3.432165  |
| 33            | 1             | 0           | -0.464343               | 5.270930  | 3.746574  |

**Table 1, OMe entry**

Energy (Hartrees) and optimized geometry (B3LYP/6-31+G(d,p)):

 $E = -710.3092017285$   $ZPVE = 0.289409$ 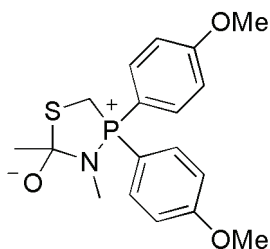

| Center Number | Atomic Number | Atomic Type | Coordinates (Angstroms) |           |           |
|---------------|---------------|-------------|-------------------------|-----------|-----------|
|               |               |             | X                       | Y         | Z         |
| 1             | 6             | 0           | 0.000000                | 0.000000  | 0.000000  |
| 2             | 1             | 0           | 0.000000                | 0.000000  | 1.098235  |
| 3             | 1             | 0           | 1.050033                | 0.000000  | -0.324081 |
| 4             | 15            | 0           | -0.838331               | 1.582446  | -0.666642 |
| 5             | 16            | 0           | -0.965191               | -1.317421 | -0.725521 |
| 6             | 6             | 0           | -0.293159               | -2.874031 | -0.041014 |
| 7             | 6             | 0           | 0.848235                | -2.779129 | 0.940626  |
| 8             | 1             | 0           | 1.694521                | -2.226749 | 0.509441  |
| 9             | 1             | 0           | 0.534107                | -2.253311 | 1.852944  |
| 10            | 1             | 0           | 1.220237                | -3.767614 | 1.243661  |
| 11            | 8             | 0           | -0.752206               | -3.948062 | -0.364899 |
| 12            | 6             | 0           | 0.669532                | 2.615682  | -0.950232 |
| 13            | 6             | 0           | 1.406436                | 2.280533  | -2.081831 |
| 14            | 6             | 0           | 1.047618                | 3.710225  | -0.183468 |
| 15            | 6             | 0           | 2.519336                | 3.024724  | -2.448594 |
| 16            | 1             | 0           | 1.100016                | 1.419821  | -2.689762 |
| 17            | 6             | 0           | 2.155679                | 4.470866  | -0.534594 |
| 18            | 1             | 0           | 0.464952                | 3.975713  | 0.709267  |
| 19            | 6             | 0           | 2.903636                | 4.127597  | -1.670357 |
| 20            | 1             | 0           | 3.088314                | 2.745309  | -3.343250 |
| 21            | 1             | 0           | 2.437154                | 5.333025  | 0.081571  |
| 22            | 6             | 0           | -1.594184               | 2.288450  | 0.865402  |
| 23            | 6             | 0           | -2.891515               | 2.750551  | 0.672417  |
| 24            | 6             | 0           | -1.014975               | 2.368009  | 2.126140  |
| 25            | 6             | 0           | -3.613985               | 3.293701  | 1.726695  |
| 26            | 1             | 0           | -3.343207               | 2.677754  | -0.325257 |
| 27            | 6             | 0           | -1.720798               | 2.905544  | 3.194861  |
| 28            | 1             | 0           | 0.007961                | 2.005698  | 2.287490  |
| 29            | 6             | 0           | -3.027642               | 3.377523  | 2.998731  |
| 30            | 1             | 0           | -4.636003               | 3.652551  | 1.556295  |
| 31            | 1             | 0           | -1.249420               | 2.959643  | 4.183326  |
| 32            | 7             | 0           | 4.104616                | 4.835042  | -1.976905 |
| 33            | 1             | 0           | 4.319942                | 4.795675  | -2.948179 |
| 34            | 1             | 0           | 4.073850                | 5.775417  | -1.651285 |
| 35            | 7             | 0           | -3.718716               | 4.028739  | 4.063216  |
| 36            | 1             | 0           | -4.706724               | 3.967446  | 3.957389  |
| 37            | 1             | 0           | -3.427958               | 3.694218  | 4.954648  |

**Table 2, H<sub>2</sub>O entry**Energy (Hartrees) and optimized geometry (B3LYP/6-31+G(d,p), scrf=(cpcm,solvent=H<sub>2</sub>O)): $E = -780.6118320298$   $ZPVE = 0.297677$ 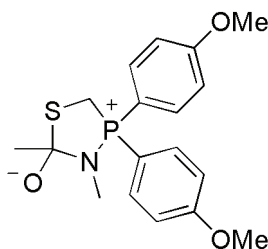

| Center Number | Atomic Number | Atomic Type | Coordinates (Angstroms) |           |           |
|---------------|---------------|-------------|-------------------------|-----------|-----------|
|               |               |             | X                       | Y         | Z         |
| 1             | 7             | 0           | 0.000000                | 0.000000  | 0.000000  |
| 2             | 6             | 0           | 0.000000                | 0.000000  | 1.577141  |
| 3             | 16            | 0           | 2.215100                | 0.000000  | 1.772724  |
| 4             | 6             | 0           | 2.598875                | -1.100987 | 0.422063  |
| 5             | 8             | 0           | -0.530826               | -1.007783 | 2.052438  |
| 6             | 6             | 0           | 3.024196                | 2.291200  | -3.737407 |
| 7             | 6             | 0           | 3.002645                | 2.528966  | -2.367099 |
| 8             | 6             | 0           | 2.474782                | 1.573851  | -1.503331 |
| 9             | 6             | 0           | 1.963909                | 0.378442  | -2.007599 |
| 10            | 6             | 0           | 1.990809                | 0.144343  | -3.378997 |
| 11            | 6             | 0           | 2.519710                | 1.096285  | -4.243379 |
| 12            | 6             | 0           | -1.329047               | -0.091959 | -0.617294 |
| 13            | 6             | 0           | -0.220186               | 1.402598  | 2.126633  |
| 14            | 1             | 0           | 3.605171                | -0.905066 | 0.020425  |
| 15            | 1             | 0           | 2.595407                | -2.170722 | 0.706857  |
| 16            | 1             | 0           | 3.439116                | 3.042054  | -4.418595 |
| 17            | 1             | 0           | 3.401472                | 3.466258  | -1.963809 |
| 18            | 1             | 0           | 2.464421                | 1.747409  | -0.410403 |
| 19            | 1             | 0           | 1.592880                | -0.796874 | -3.782128 |
| 20            | 1             | 0           | 2.538618                | 0.905416  | -5.321602 |
| 21            | 1             | 0           | -1.241042               | -0.170710 | -1.714729 |
| 22            | 1             | 0           | -1.914119               | -0.950103 | -0.253286 |
| 23            | 1             | 0           | -1.878301               | 0.826778  | -0.370917 |
| 24            | 1             | 0           | -0.049832               | 1.414639  | 3.211297  |
| 25            | 1             | 0           | 0.449791                | 2.145171  | 1.673688  |
| 26            | 1             | 0           | -1.254357               | 1.727516  | 1.946610  |
| 27            | 15            | 0           | 1.322679                | -0.777682 | -0.813530 |
| 28            | 6             | 0           | 0.846679                | -2.294516 | -1.645043 |
| 29            | 6             | 0           | 1.464330                | -3.485688 | -1.272231 |
| 30            | 6             | 0           | -0.138669               | -2.322545 | -2.629407 |
| 31            | 6             | 0           | 1.124328                | -4.684428 | -1.890260 |
| 32            | 1             | 0           | 2.215642                | -3.471994 | -0.463898 |
| 33            | 6             | 0           | -0.482760               | -3.516870 | -3.253015 |
| 34            | 1             | 0           | -0.670222               | -1.391118 | -2.888299 |
| 35            | 6             | 0           | 0.153401                | -4.699450 | -2.886854 |
| 36            | 1             | 0           | 1.615917                | -5.615142 | -1.586575 |
| 37            | 1             | 0           | -1.259043               | -3.527036 | -4.025706 |
| 38            | 1             | 0           | -0.116466               | -5.641702 | -3.376230 |

**Table 2, THF entry**

Energy (Hartrees) and optimized geometry (B3LYP/6-31+G(d,p), scrf=(cpcm,solvent=THF)):

 $E = -780.6118320298$   $ZPVE = 0.297677$ 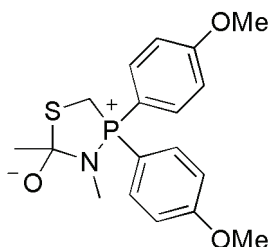

| Center Number | Atomic Number | Atomic Type | Coordinates (Angstroms) |           |           |
|---------------|---------------|-------------|-------------------------|-----------|-----------|
|               |               |             | X                       | Y         | Z         |
| 1             | 7             | 0           | 0.000000                | 0.000000  | 0.000000  |
| 2             | 6             | 0           | 0.000000                | 0.000000  | 1.577141  |
| 3             | 16            | 0           | 2.215100                | 0.000000  | 1.772724  |
| 4             | 6             | 0           | 2.598875                | -1.100987 | 0.422063  |
| 5             | 8             | 0           | -0.530826               | -1.007783 | 2.052438  |
| 6             | 6             | 0           | 3.024196                | 2.291200  | -3.737407 |
| 7             | 6             | 0           | 3.002645                | 2.528966  | -2.367099 |
| 8             | 6             | 0           | 2.474782                | 1.573851  | -1.503331 |
| 9             | 6             | 0           | 1.963909                | 0.378442  | -2.007599 |
| 10            | 6             | 0           | 1.990809                | 0.144343  | -3.378997 |
| 11            | 6             | 0           | 2.519710                | 1.096285  | -4.243379 |
| 12            | 6             | 0           | -1.329047               | -0.091959 | -0.617294 |
| 13            | 6             | 0           | -0.220186               | 1.402598  | 2.126633  |
| 14            | 1             | 0           | 3.605171                | -0.905066 | 0.020425  |
| 15            | 1             | 0           | 2.595407                | -2.170722 | 0.706857  |
| 16            | 1             | 0           | 3.439116                | 3.042054  | -4.418595 |
| 17            | 1             | 0           | 3.401472                | 3.466258  | -1.963809 |
| 18            | 1             | 0           | 2.464421                | 1.747409  | -0.410403 |
| 19            | 1             | 0           | 1.592880                | -0.796874 | -3.782128 |
| 20            | 1             | 0           | 2.538618                | 0.905416  | -5.321602 |
| 21            | 1             | 0           | -1.241042               | -0.170710 | -1.714729 |
| 22            | 1             | 0           | -1.914119               | -0.950103 | -0.253286 |
| 23            | 1             | 0           | -1.878301               | 0.826778  | -0.370917 |
| 24            | 1             | 0           | -0.049832               | 1.414639  | 3.211297  |
| 25            | 1             | 0           | 0.449791                | 2.145171  | 1.673688  |
| 26            | 1             | 0           | -1.254357               | 1.727516  | 1.946610  |
| 27            | 15            | 0           | 1.322679                | -0.777682 | -0.813530 |
| 28            | 6             | 0           | 0.846679                | -2.294516 | -1.645043 |
| 29            | 6             | 0           | 1.464330                | -3.485688 | -1.272231 |
| 30            | 6             | 0           | -0.138669               | -2.322545 | -2.629407 |
| 31            | 6             | 0           | 1.124328                | -4.684428 | -1.890260 |
| 32            | 1             | 0           | 2.215642                | -3.471994 | -0.463898 |
| 33            | 6             | 0           | -0.482760               | -3.516870 | -3.253015 |
| 34            | 1             | 0           | -0.670222               | -1.391118 | -2.888299 |
| 35            | 6             | 0           | 0.153401                | -4.699450 | -2.886854 |
| 36            | 1             | 0           | 1.615917                | -5.615142 | -1.586575 |
| 37            | 1             | 0           | -1.259043               | -3.527036 | -4.025706 |
| 38            | 1             | 0           | -0.116466               | -5.641702 | -3.376230 |
